# Supplementary material for: The effect of Mn on the performance of MCF-supported highly dispersed iron catalysts for Fischer–Tropsch synthesis
Source: Royal Society of Chemistry journal article supplement (doi:10.1039/c9cy02140j), 2019-12-16
Supplement: c9cy02140j1.pdf [file c9cy02140j1.pdf]

## Supporting Information

### **The effect of Mn on performance of MCF-supported highly dispersed iron catalysts for Fischer–Tropsch synthesis**

*Siyuan Huang<sup>a</sup>, Chengchao Liu<sup>a</sup>, Yao Chen<sup>a,b</sup>, Jingping Hong<sup>a</sup>, Yanxi Zhao<sup>a</sup>, Yuhua Zhang<sup>a</sup>, Jinlin Li<sup>\*a</sup>*

*<sup>a</sup>Key Laboratory of Catalysis and Energy Materials Chemistry of Ministry of Education & Hubei Key Laboratory of Catalysis and Materials Science, South-Central University for Nationalities, Wuhan 430074, China.*

*<sup>b</sup>Key Lab for Green Chemical Technology of Ministry of Education, School of Chemical Engineering and Technology, Collaborative Innovation Center of Chemical Science and Engineering (Tianjin), Tianjin University, Tianjin 300072, China*

*Corresponding author: Jinlin Li*

*E-mail address: [Jinlinli@aliyun.com](mailto:Jinlinli@aliyun.com)*

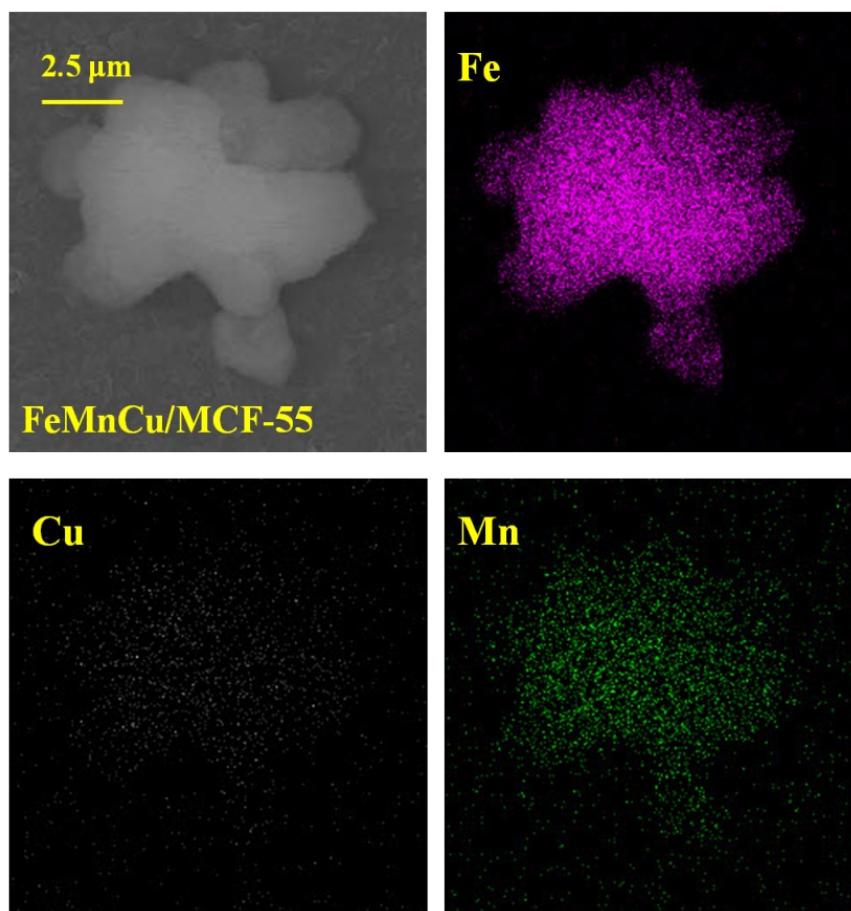

Fig. S1 SEM images of the FeMnCu/MCF-55 catalyst and SEM-EDX elemental mapping of Fe, Mn, and Cu on the catalyst.

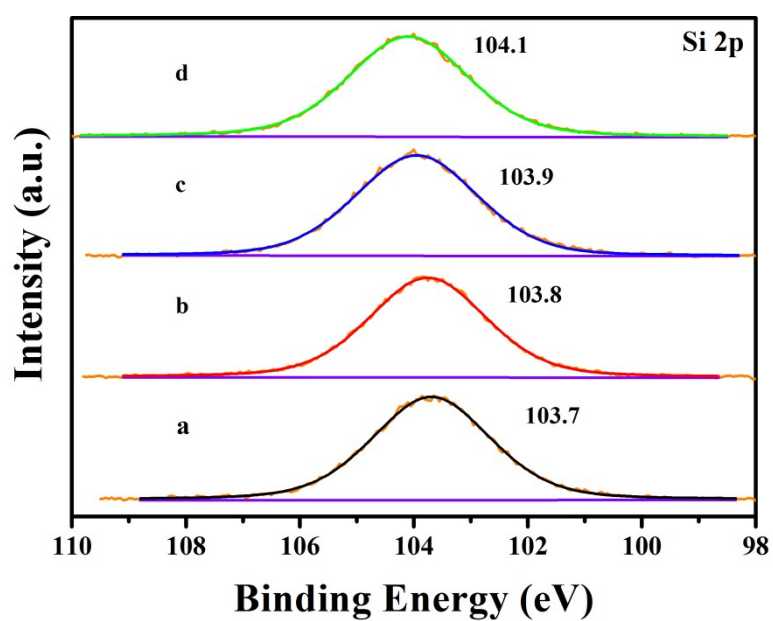

Fig. S2 The XPS profiles of Si2p for supported catalysts: a) FeMnCu/MCF-0; b) FeMnCu/MCF-9; c) FeMnCu/MCF-27; and d) FeMnCu/MCF-55.
